# Supplementary material for: Theoretical investigation of electrochromic mechanism in D–A conjugated polymers in visible and infrared bands
Source: Royal Society of Chemistry journal article supplement (doi:10.1039/d3ra01600e), 2023-01-01
Supplement: d3ra01600e1.pdf [file d3ra01600e1.pdf]

## Supplementary Information

Study on the mechanism of electrochromic change in the visible and infrared bands of D-A conjugated polymers based on PEDOT and its copolymer.

Figure S1. The degree of polymerization of Trans-PEDOT

Figure S2. The degree of polymerization of Cis-PEDOT

Figure S3. The degree of polymerization of PPr

Figure S4. The degree of polymerization of PEP

Figure S5. HOMO, LUMO, and  $\pi$  electron distributions of the cis and trans structures of PEDOT

Figure S6. Schematic diagram of the cis/trans structure of PEDOT and trans PEDOT in O-S bond length varies

Figure S7. The average dihedral angle change in the PEP

Figure S8. The PEDOT cis and trans structure with a degree of polymerization of 6 changes in the amount of charge and the average dihedral angle

Figure S9.  $\pi$  electron distribution and electrostatic potential distribution of PEP

Figure S10. HOMO, LUMO, and  $\pi$  electronic density contour surface chart of polypyrene

Figure S11. HOMO, LUMO, and  $\pi$  electronic density contour surface chart of  $PE_mP_n$

Figure S12. NTO of PEP

Figure S13. Vertical ionization potential

Figure S14. Energy level distribution of properties in PEP molecules and HOMO-LUMO

Figure S15. Open or shell state and closed-shell state energy level distribution of bipolarizing PEP molecules and HOMO-LUMO

Figure S16. Energy level distribution of the open-shell state of the polarizing-PEP molecules and HOMO-LUMO

Table S1. The degree of polymerization of  $PE_mP_n$

Table S2. MPI index, polar and non-polar surface area, and molecular dipole moments of PEP formed by different link structures

Table S3. MPI index, polar and non-polar surface area and energy difference of cis-PEDOT(Cis) and trans-PEDOT (Trans) structures

Figure S1. The degree of polymerization of Trans-PEDOT

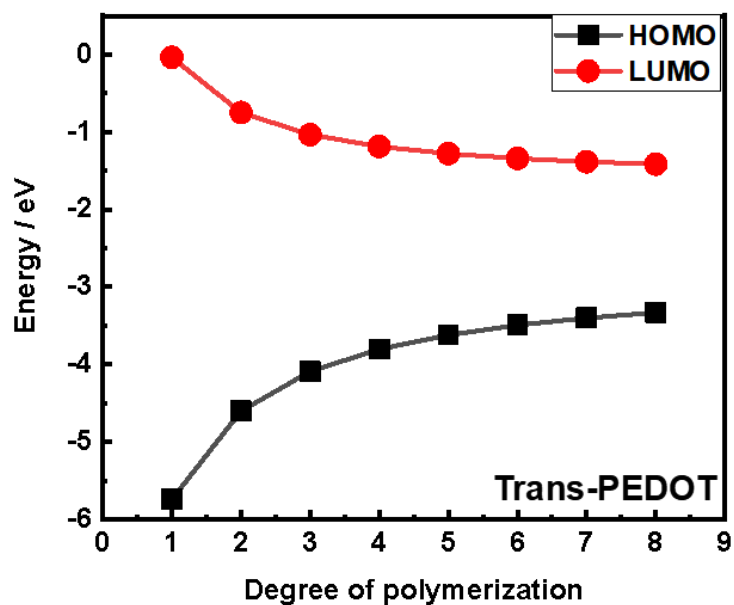

Figure S2. The degree of polymerization of Cis-PEDOT

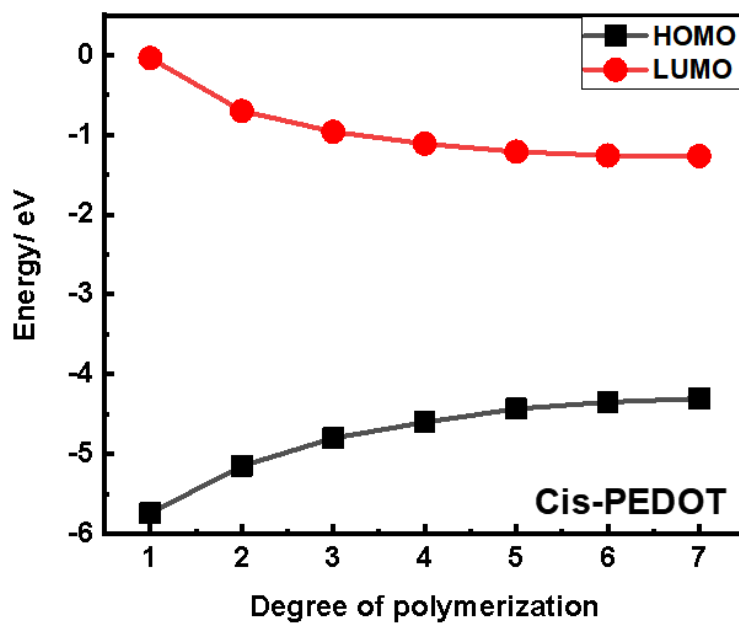

Figure S3. The degree of polymerization of PPr

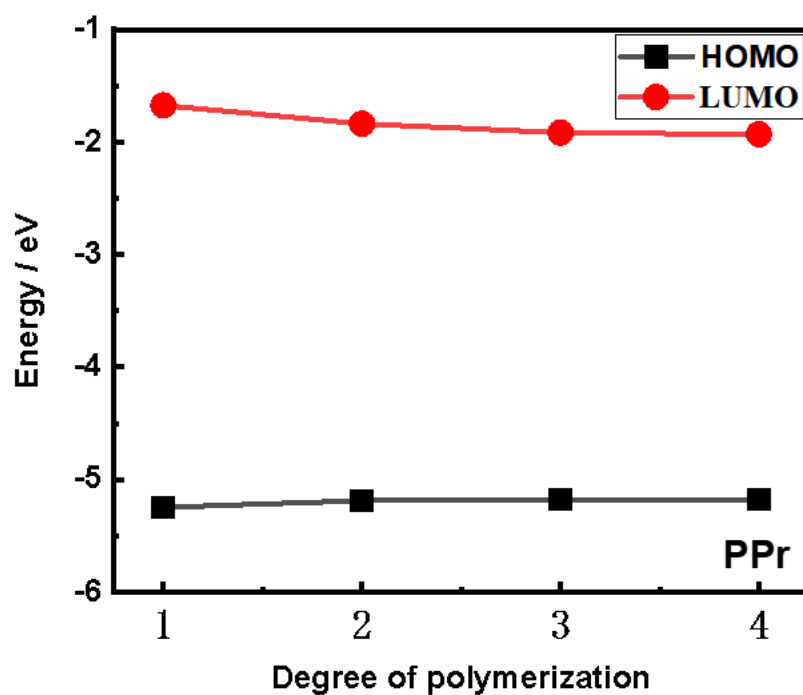

Figure S4. The degree of polymerization of PEP

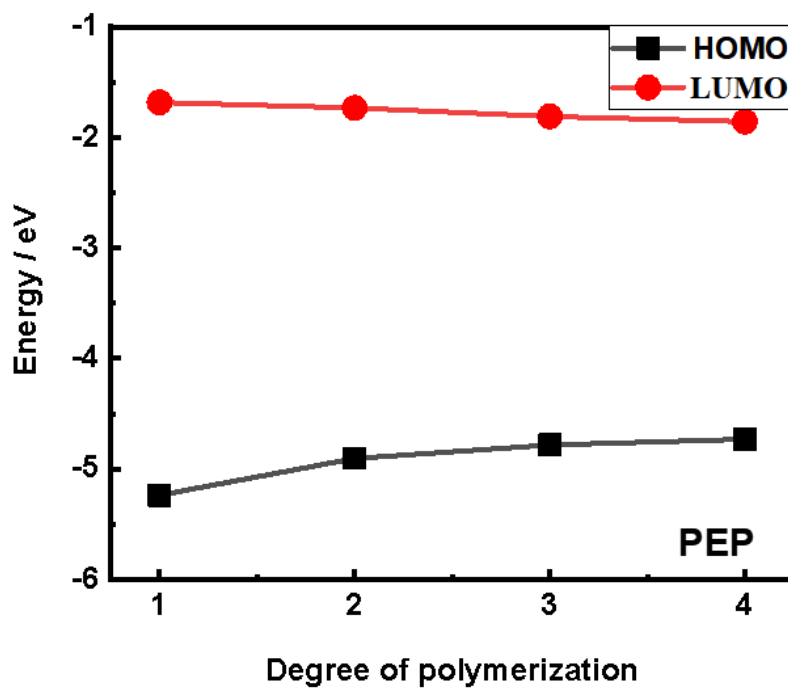

Figure S5. HOMO, LUMO, and  $\pi$  electron distributions of the cis and trans structures of PEDOT

| PEDOT-Trans | 0e                                                                                  | +1e                                                                                 | +2e                                                                                  | +3e                                                                                 |
|-------------|-------------------------------------------------------------------------------------|-------------------------------------------------------------------------------------|--------------------------------------------------------------------------------------|-------------------------------------------------------------------------------------|
| LUMO        | 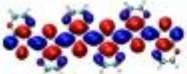   |    |    |  |
| HOMO        |    |    |    |  |
| $\pi$ e     |    |    |    |  |
|             | +4e                                                                                 | +5e                                                                                 | +6e                                                                                  |                                                                                     |
| LUMO        |    |    |    |                                                                                     |
| HOMO        |   |   |   |                                                                                     |
| $\pi$ e     |  |  |  |                                                                                     |

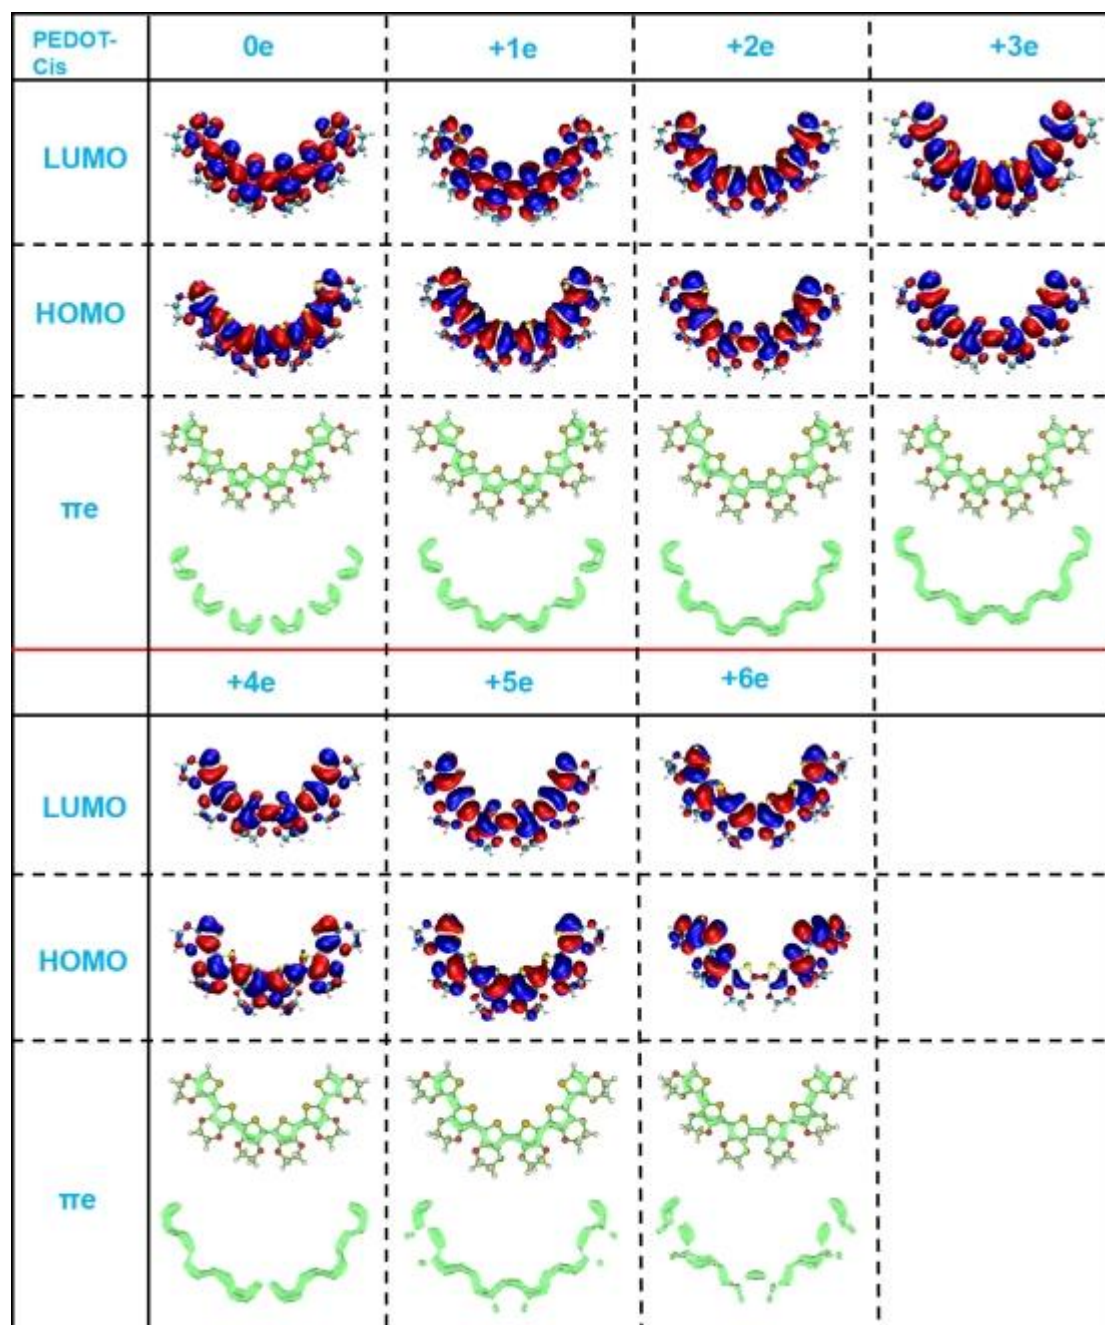

Figure S6. Schematic diagram of the cis/trans structure of PEDOT and trans- PEDOT in O-S bond length varies

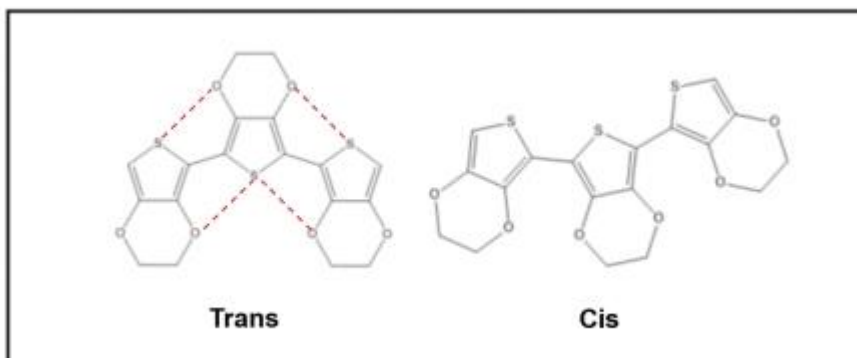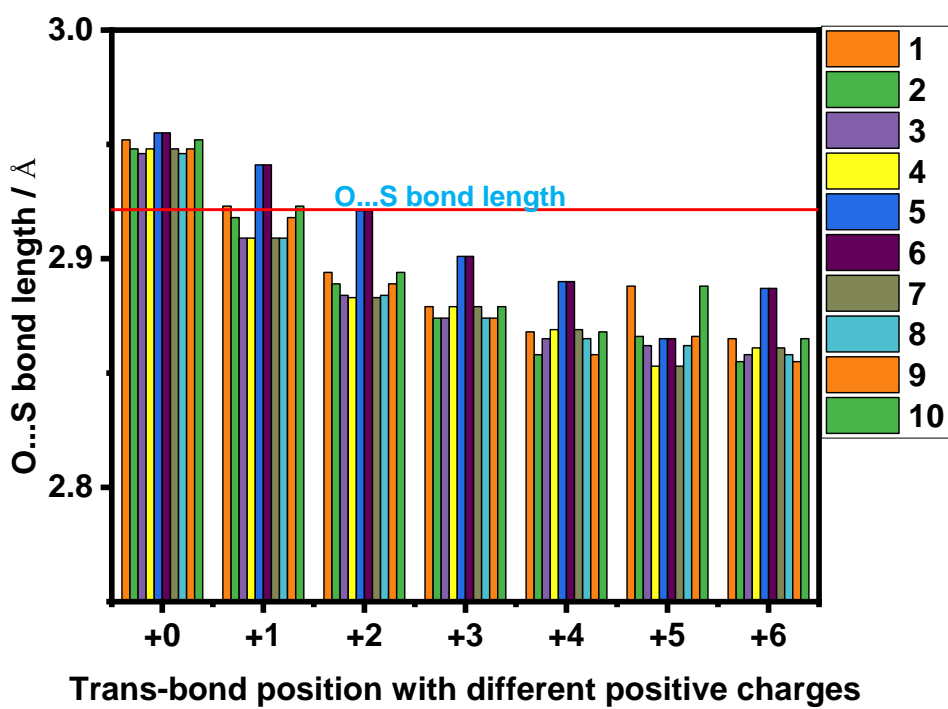

Figure S7. The average dihedral angle change in the PEP

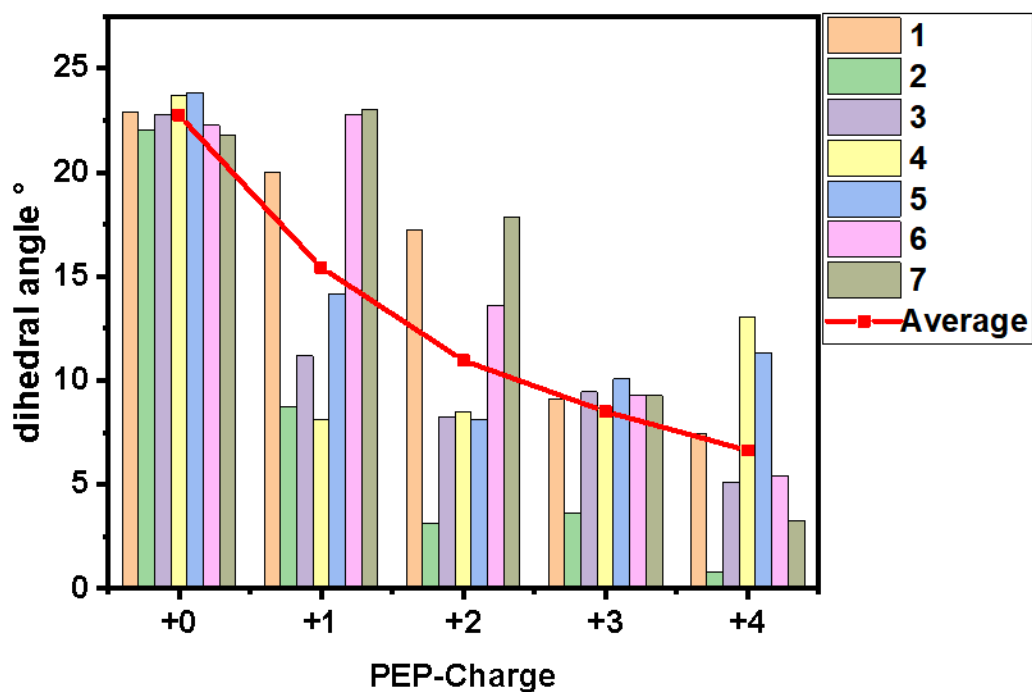

Figure S8. The PEDOT cis and trans structure with a degree of polymerization of 6 changes in the amount of charge and the average dihedral angle

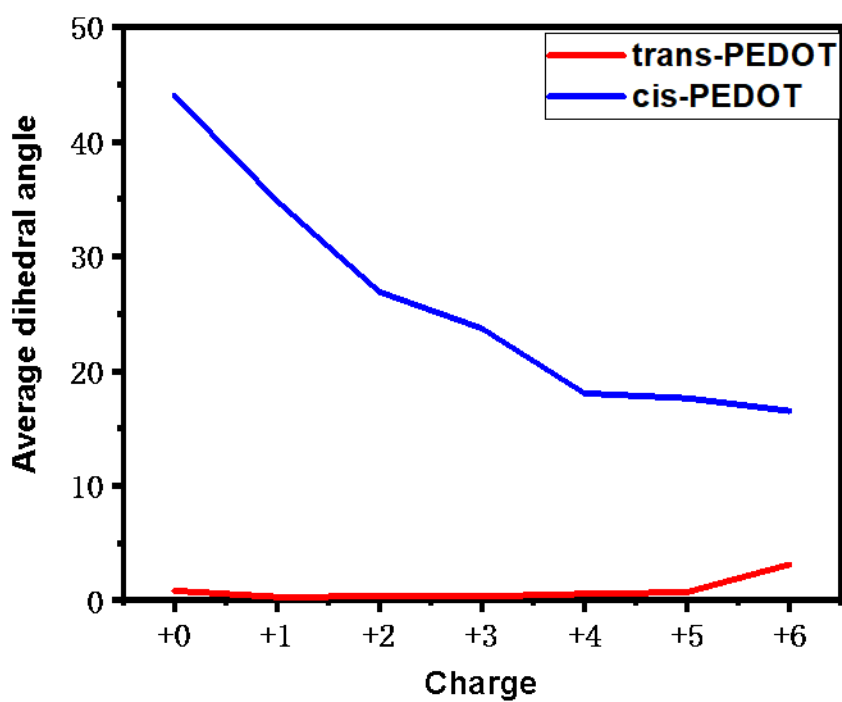

Figure S9. Electron distribution and  $\pi$  electrostatic potential distribution of PEP

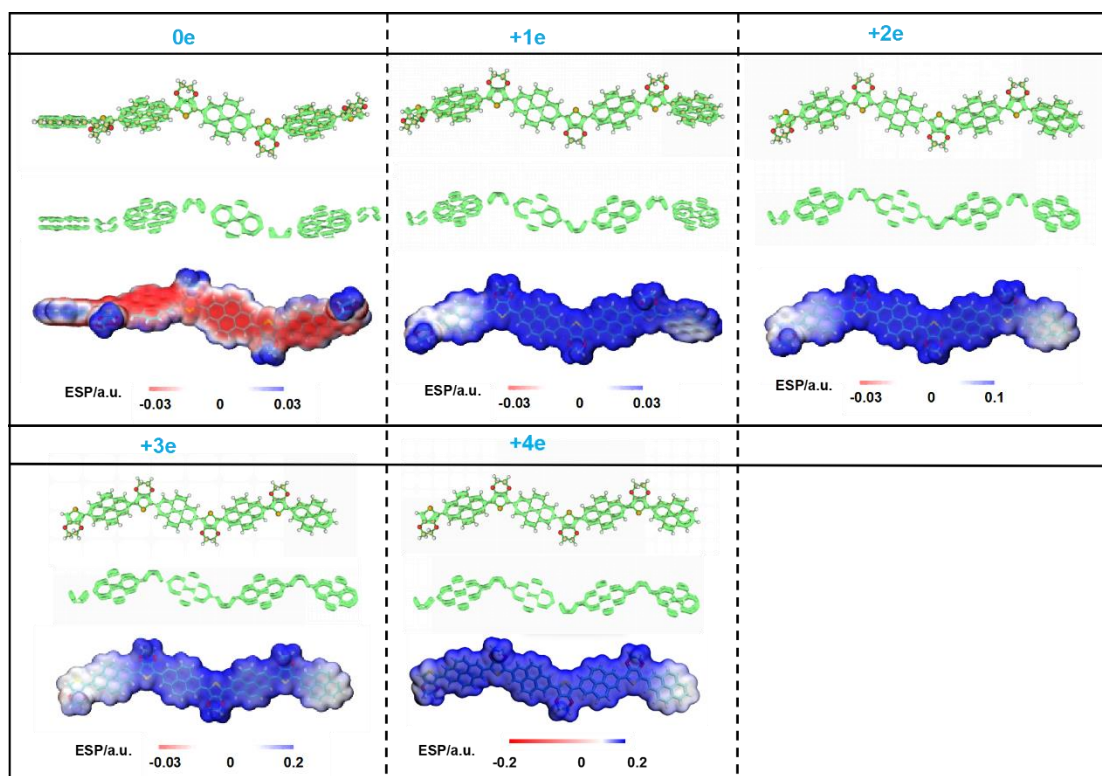

Figure S10. HOMO, LUMO, and  $\pi$  electronic density contour surface chart of polypyrene



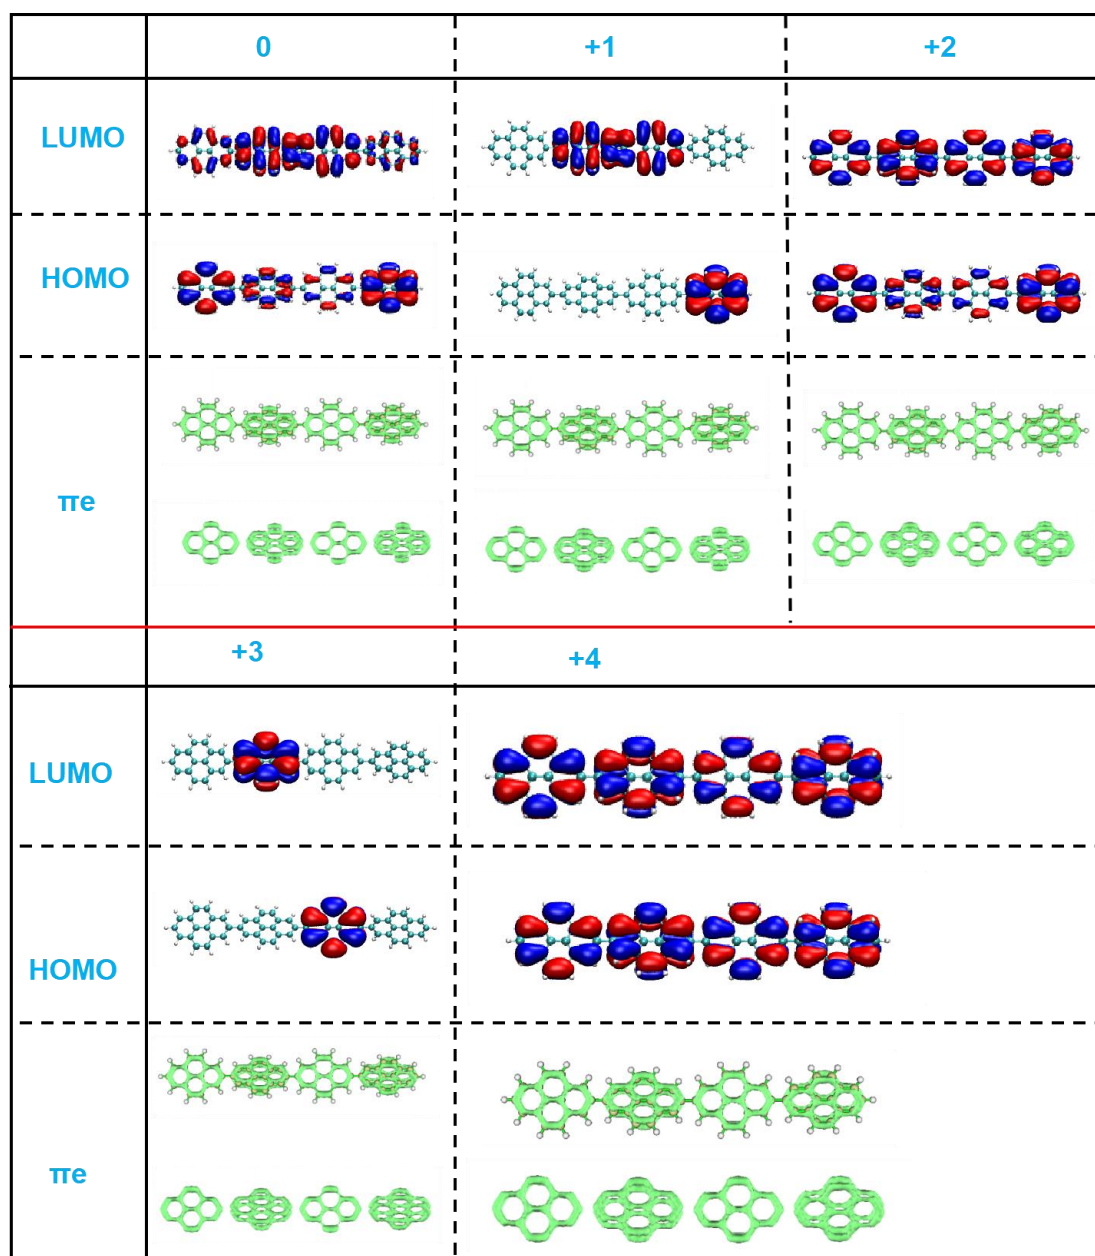

Figure S11. HOMO, LUMO, and  $\pi$  electronic density contour surface chart of  $PE_mP_n$

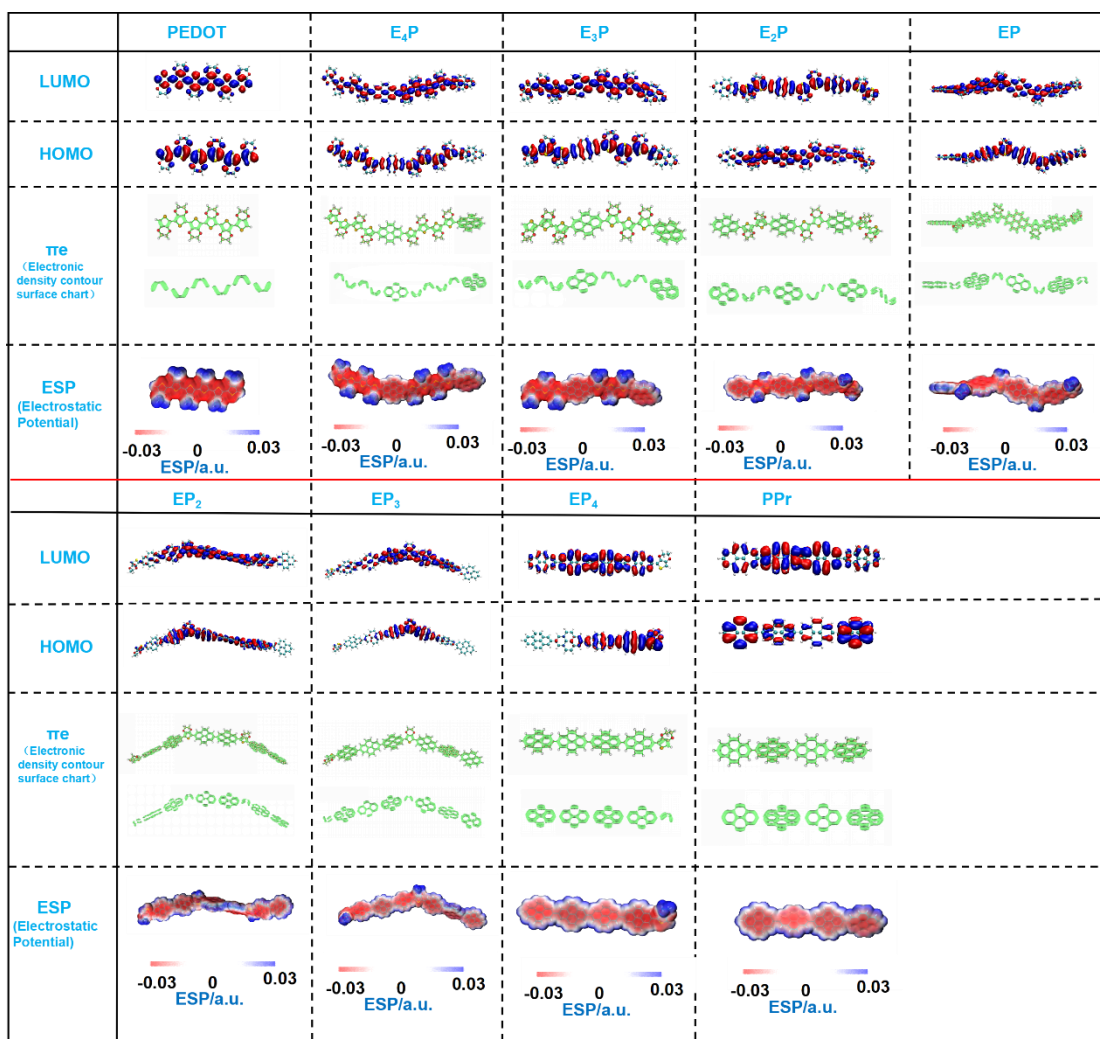

Figure S12. NTO of PEP

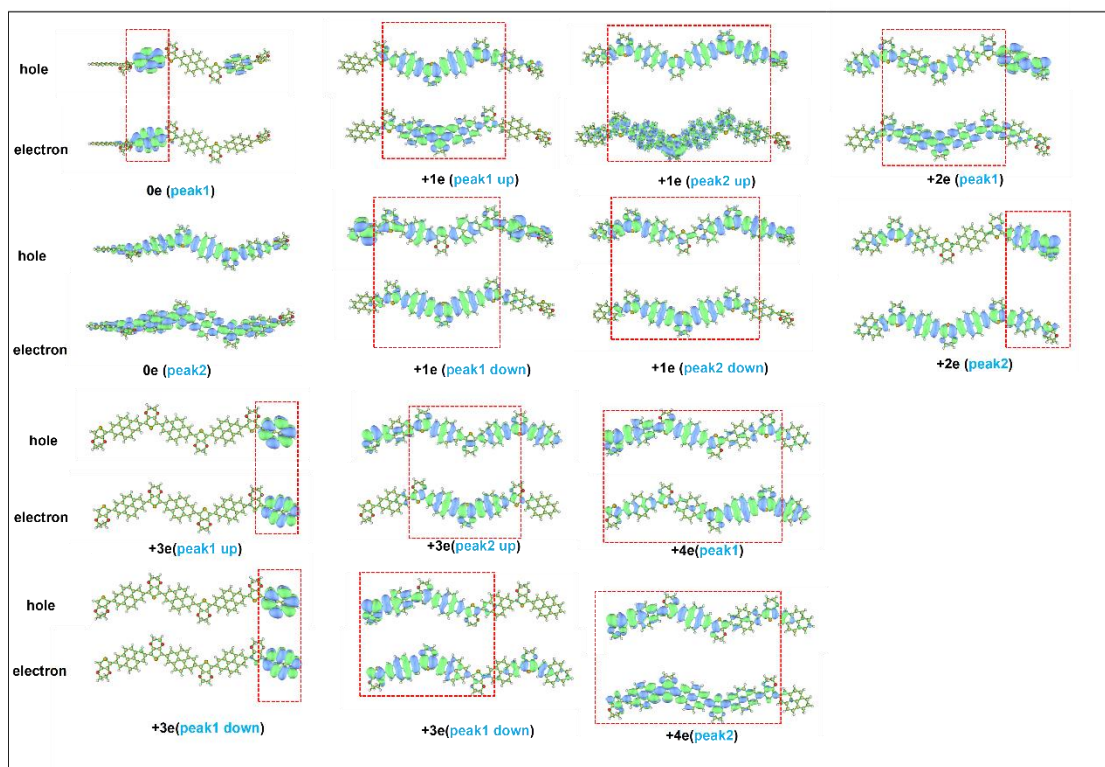

Figure S13. Vertical ionization potential

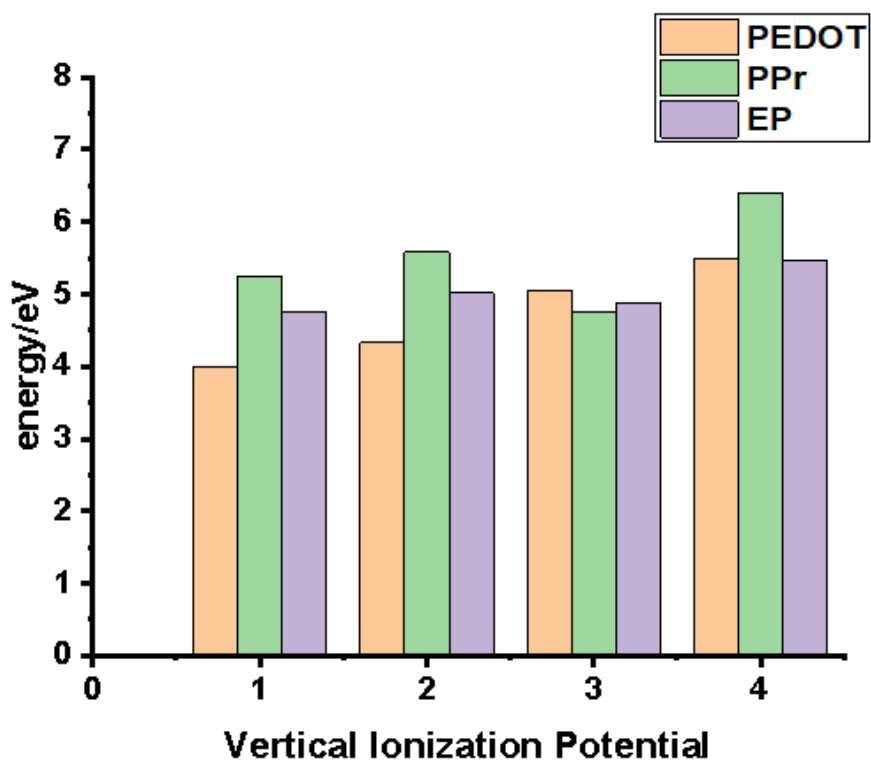

Table S1. The degree of polymerization of PE<sub>m</sub>P<sub>n</sub>

| structure | Degree of aggregation | HOMO  | LUMO  | gap/eV |
|-----------|-----------------------|-------|-------|--------|
| E4P       | 1                     | -4.33 | -1.69 | 2.64   |
|           | 2                     | -4.08 | -1.90 | 2.18   |
|           | 3                     | -4.46 | -1.87 | 2.59   |
| E3P       | 1                     | -4.51 | -1.68 | 2.83   |
|           | 2                     | -4.24 | -1.87 | 2.37   |
|           | 3                     | -4.63 | -1.76 | 2.87   |
| E2P       | 1                     | -4.68 | -1.67 | 3.01   |
|           | 2                     | -4.47 | -1.78 | 2.70   |
|           | 3                     | -4.40 | -1.88 | 2.57   |
| EP2       | 1                     | -5.19 | -1.87 | 3.34   |
|           | 2                     | -4.92 | -1.86 | 3.06   |
|           | 3                     | -4.88 | -1.88 | 3.00   |
| EP3       | 1                     | -5.19 | -1.89 | 3.31   |
|           | 2                     | -4.95 | -1.91 | 3.03   |
|           | 3                     | -5.19 | -1.88 | 3.31   |
| EP4       | 1                     | -5.18 | -1.91 | 3.28   |
|           | 2                     | -5.39 | -1.67 | 3.73   |

Table S2. MPI index, polar and non-polar surface area, and molecular dipole moments of PEP formed by different link structures

| Structure                                     | 1     | 2     | 3     | 4     | 5     |
|-----------------------------------------------|-------|-------|-------|-------|-------|
| MPI / kcal/mol                                | 12.75 | 12.70 | 12.73 | 12.73 | 12.67 |
| Nonpolar surface area / Angstrom <sup>2</sup> | 127   | 123   | 125   | 125   | 124   |
|                                               | (37%) | (36%) | (37%) | (37%) | (36%) |
| Polar surface area / Angstrom <sup>2</sup>    | 214   | 216   | 213   | 214   | 215   |
|                                               | (63%) | (64%) | (63%) | (63%) | (64%) |
| Molecular dipole moment / D                   | 3.46  | 3.13  | 3.25  | 3.16  | 3.20  |
| dihedral angle                                | 21.3  | 54.4  | 52.8  | 55.5  | 49.5  |

Table S3. MPI index, polar and non-polar surface area and energy difference of cis-PEDOT (Cis) and trans-PEDOT (Trans) structures

| Trans                                         | 0     | +1   | +2   | +3   | +4   | +5   | +6   |
|-----------------------------------------------|-------|------|------|------|------|------|------|
| Molecular polarity in dex / kcal/mol          | 19    | 44   | 92   | 140  | 189  | 238  | 287  |
| Nonpolar surface area / Angstrom <sup>2</sup> | 146   | 4.15 | 0.00 | 0.00 | 0.00 | 0.00 | 0.00 |
|                                               | (21%) | (1%) | (0%) | (0%) | (0%) | (0%) | (0%) |

|                                                  |                  |                  |                   |                   |                   |                   |                   |
|--------------------------------------------------|------------------|------------------|-------------------|-------------------|-------------------|-------------------|-------------------|
| Polar surface area /<br>Angstrom <sup>2</sup>    | 564<br>(79 %)    | 701<br>(99%)     | 702<br>(100 %)    | 699<br>(100 %)    | 696<br>(100 %)    | 694<br>(100 %)    | 693<br>(100 %)    |
| <b>Cis</b>                                       | <b>0</b>         | <b>+1</b>        | <b>+2</b>         | <b>+3</b>         | <b>+4</b>         | <b>+5</b>         | <b>+6</b>         |
| Molecular polarity in<br>dex / kcal/mol          | 20               | 43               | 91                | 139               | 187               | 236               | 285               |
| Nonpolar surface area<br>/ Angstrom <sup>2</sup> | 138<br>(19%<br>) | 8<br>(1%)        | 0.00<br>(0%)      | 0.00<br>(0%)      | 0.00<br>(0. %)    | 0.00<br>(0%)      | 0.00<br>(0 %)     |
| Polar surface area /<br>Angstrom <sup>2</sup>    | 590<br>(81%<br>) | 711<br>(99<br>%) | 712<br>(100<br>%) | 708<br>(100<br>%) | 704<br>(100<br>%) | 702<br>(100<br>%) | 700<br>(100%<br>) |
| <b>Cis-Trans</b>                                 | <b>0</b>         | <b>+1</b>        | <b>+2</b>         | <b>+3</b>         | <b>+4</b>         | <b>+5</b>         | <b>+6</b>         |
| Poor energy / eV                                 | 0.53             | 0.91             | 1.19              | 1.28              | 1.29              | 1.24              | 1.10              |
